# Supplementary material
Source: Elsevier journal article supplement (https://www.sciencedirect.com/science/article/pii/S0213911118301523)
Supplement: mmc1 [file S0213911118301523:mmc1.docx]

# **Apéndice**

# **Texto completo del diálogo**

# **¿Qué hacemos y qué podríamos hacer desde el sistema sanitario en salud comunitaria?**

Somos cinco personas las que hemos compartido nuestras reflexiones en torno al tema propuesto en este diálogo. Cinco personas diferentes, de profesiones y ámbitos distintos. Tres compañeras y un compañero con un gran compromiso con el sistema sanitario y la sociedad en la que vivimos, y quien escribe esta introducción en calidad de anfitriona.

Una conversación sobre lo que hacemos en nuestro sistema sanitario en relación con la salud comunitaria, si es suficiente o no, y qué hoja de ruta puede trazarse ante la realidad que describimos y analizamos.

Ha sido un gran lujo sentar a conversar a Rosa, Teresa, Rafael e Isabel sobre la salud comunitaria y el sistema sanitario. Quiero agradecerles su ánimo, entusiasmo, disposición y confianza. Gracias a los editores del Informe SESPAS 2018 por la oportunidad que nos han brindado.

Les invitamos a leer con calma esta transcripción completa del diálogo mantenido entre sus participantes. Con sus aportaciones se ha confeccionado el artículo del Informe SESPAS 2018. Muy difícil se nos ha hecho resumir en algo más de 1500 palabras todo lo dialogado. Tras leer este texto, les animamos a que opinen, compartan, debatan, dialoguen con sus colegas, amistades, pacientes, familia, jefes o jefas, vecinos y vecinas… Sigan el diálogo a lo ancho y largo del sistema sanitario, porque nuestro sistema necesita que todas y todos, estemos donde quiera que estemos, hablemos y nos escuchemos. «Una institución que escucha es una institución que avanza», decía Bayona. Hagamos, pues, que el sistema avance en lo comunitario. Empecemos reconociéndonos, conversando y escuchándonos unas a otros, otras a unos, quienes quiera que seamos y donde quiera que estemos en este, como bien opina Teresa, sistema del que somos propietarios y propietarias. Y como dice la buena gente de Asturias: que la conversación nos lleve a la acción. ¡Que la fuerza de lo comunitario nos acompañe!

Carmen Belén Benedé Azagra

_________________________________________________

«Orientar comunitariamente la práctica profesional significa intervenir organizadamente en la realidad social con otros actores —técnicos profesionales e instituciones afincados en el mismo territorio y que atienden a una misma población— para que, conociendo las realidades locales, con un diagnóstico participativo, pudieran establecer estrategias comunes, coordinadas y cooperativas para la resolución de los problemas, demandas y necesidades de esa comunidad humana, contando con su participación y protagonismo.»

Aguiló, E. (2008). Contexto actual de la Atención Primaria: dificultades y oportunidades para las actividades comunitarias.

Enero de 2018

Sol en Jaén y Murcia, con un poco de cierzo en Aragón. Conversamos…

**Belén:** Queridos Rosa, Rafael, Isabel y Teresa, la salud es bienestar individual y colectivo y está determinada por factores que trascienden el sistema sanitario. Si este quiere abordar la dimensión colectiva es preciso cambiar su orientación. La salud comunitaria está incluida teóricamente en la legislación, la formación, la coordinación y la planificación, pero...

**Belén: ¿Qué se hace o no en salud comunitaria?**

**Rosa:** Contestando a la pregunta de qué hacemos en salud comunitaria desde el sistema sanitario, mi impresión es que los profesionales de la salud hacemos poco, con poco apoyo, de manera poco coordinada y con actividades poco evaluadas. Hemos olvidado la parte comunitaria que tiene la esencia de la atención primaria de salud, en pos de actividades más «prioritarias», para la administración sanitaria y la sociedad en general. Una sociedad y una gestión sanitaria que, a pesar de conocer la teoría y la concepción amplia de la salud, ya supongo definida en este diálogo y en otros artículos del Informe SESPAS 2018, sigue considerando casi en exclusiva los aspectos asistenciales de los servicios sanitarios, obviando casi por completo los aspectos comunitarios del enfoque salud, relegando lo social o el contexto a la periferia.

Así que lo que podríamos hacer desde el sistema sanitario sería recuperar y poner en su lugar la faceta comunitaria de la salud. La gestión sanitaria debería incorporar a los servicios de salud, con el peso específico que les corresponde, intervenciones comunitarias de efectividad contrastada, encaminadas a producir y mantener la salud en las comunidades.

Los profesionales, por otra parte, deberían tomar conciencia de esta parte de su actividad profesional que está prácticamente huérfana y dejada al voluntarismo de algunos, para pasar a una postura profesional de reivindicación de su propio papel en la salud comunitaria, con todo lo que ello implica en cuanto a recursos, tiempos, etc.

**Teresa:** La atención primaria de salud se configuró como la estrategia recomendada por la Organización Mundial de la Salud para disminuir las desigualdades sociales en la salud que son la causa de las causas para comprender el nivel de salud de la población. Por ello, este debería ser el objetivo de las políticas públicas gubernamentales, que no solo afecta al sistema sanitario, sino que debe englobar a todo el sistema del Estado del bienestar. Hay mucho paternalismo del sistema y poco abordaje de condiciones de vida; son importantes la participación, la equidad y el empoderamiento individual y colectivo.

**Rafael:** Creo que, de cara a la comunidad, predominan las actividades preventivas de ámbito comunitario y las de promoción de la salud de carácter puntual y aislado en colaboración con ayuntamientos o colegios. Pero incluso estas actividades, en su conjunto, son minoritarias respecto al resto de las actividades en atención primaria.

**Belén:** La salud es bienestar, pero no solo individual, sino también colectiva, y viene determinada por factores más allá del sistema sanitario. La prevención, la promoción de la salud y la atención y la intervención comunitaria, la salud comunitaria, forman parte intrínseca del perfil de los profesionales del sistema sanitario, donde quiera que se sitúen en este, y se incluye en la legislación, la formación, la coordinación y la planificación de los servicios de salud. ¿Pero asume el sistema esta responsabilidad social de cuidado que parte del derecho esencial? ¿Aborda las condiciones y los requisitos para la salud con equidad, justicia social u orientación a los determinantes? Para abordar la dimensión colectiva de la salud, mejorando la eficiencia y la reducción del gasto, es necesaria una unión, una alianza, entre atención primaria, salud pública y ciudadanía. ¿Lo hacemos?

**Isabel:** En salud comunitaria, por lo general, se tiene mayor disponibilidad para hacer un buen trabajo en equipos interdisciplinarios y para incluir la intersectorialidad. En salud mental comunitaria se van incorporando cada vez más la participación y la visión de las personas atendidas y las familias, se hace un buen uso de los recursos comunitarios (sociales, educativos, sanitarios…), se va incorporando la sensibilización, la lucha contra el estigma y la prevención en ámbitos como el escolar, y se trabaja lo sanitario y lo social de manera conjunta. Lo que no se hace suficiente en salud comunitaria es trabajar desde la promoción, desde el punto de vista de la salud positiva, fomentando potencialidades y fortalezas de las comunidades, y trabajar de verdad en colectivo con agentes y movimientos sociales. En el caso de la salud mental, faltan muchos pasos para una auténtica inclusión y participación de las personas con «sufrimiento psíquico» y su desestigmatización dentro del propio sistema de salud.

**Belén: ¿Qué pensáis se debería hacer?**

**Rosa:** Entiendo que esta pregunta es reiterativa de la anterior, pero amplío mi opinión al respecto. La salud comunitaria debería recuperar, quizá es incorrecto decir recuperar, sería más bien situarse en el nivel prioritario que le corresponde en todos los ámbitos para conseguir su objetivo de mejorar la salud de las poblaciones. Quizá lo primero sería definir y consensuar el concepto de salud comunitaria para que todo el mundo sepa de lo que estamos hablando, qué significa, qué objetivos lleva implícitos, cuáles son las metas, quiénes son los actores implicados, etc. Lo segundo, ya aterrizando en los sistemas sanitarios, es concederle la importancia que se merece. Y ello implica varias cuestiones. Primero, que la gestión cambie su chip de gestionar los servicios con el único fin de solventar las cuestiones asistenciales relativas a la enfermedad, que incluya los procesos comunitarios de efectividad contrastada en la cartera de servicios, incorporándolos a la historia clínica electrónica, dotando de los recursos necesarios para que se lleven a la práctica, incluyendo el recurso tiempo necesario para ello. Segundo, que los profesionales se formen con el apoyo de la gestión, y se sensibilicen de su importancia. Y tercero, que la sociedad en general, incluyendo la sociedad de la información, los medios de comunicación, la comunidad científica en general, eviten considerar la fascinación tecnológica como el valor preponderante de los servicios sanitarios. Unos servicios sanitarios basados en acciones coste-efectivas de prevención y promoción de la salud, que lleguen a una inmensa mayoría de la población, que modifiquen estilos de vida, que disminuyan el riesgo de morbilidad, que contribuyan a que los ciudadanos tengan herramientas para una vida más saludable y satisfactoria. En este sentido, las administraciones locales tienen un papel protagonista en todo este proceso de reconversión social hacia un concepto más acorde con la salud comunitaria. Un aspecto vital de lo que debería hacerse, aunque creo que es objeto de otro artículo del Informe SESPAS 2018, es que la Administración local debe asumir su responsabilidad de que los ciudadanos dispongan de los recursos necesarios para modificar sus estilos de vida. La Administración local es la más cercana al ciudadano, la que conoce, junto con los servicios sanitarios locales, cómo es la población que administra. Y de la misma manera que es responsable de la gestión de residuos, debería trabajar por conseguir que la población disponga de suficientes espacios verdes para hacer ejercicio, que tenga recursos orientados hacia su bienestar emocional, que supervise que los recursos comunitarios son los adecuados a las necesidades de salud de sus vecinos, activos en salud. Por último, pero no menos importante, la ciudadanía debería asumir la parte de responsabilidad que le toca en la gestión de su propia salud, y ejercer el papel de control de la gestión de los servicios sanitarios. Los consejos de salud, en este sentido, tienen un papel fundamental.

**Teresa:** Dentro de esa estrategia, este primer nivel asistencial debería integrar una atención no solo centrada en la persona, sino ampliada a sus redes sociales más directas, su familia y su comunidad. Con esa interacción de profesionales sanitarios y comunidad se produciría más salud, tanto individual como colectiva.

**Rafael:** Intervenciones basadas en un proceso previo de planificación (de acuerdo con los problemas, los recursos y las necesidades percibidas por la población; de carácter proactivo; con participación y coordinación intersectorial) y en la participación de la comunidad.

**Belén:** Para incluir la dimensión comunitaria está claro que hay que «hacer»una serie de acciones en todos los niveles del sistema sanitario. En la actualidad, al considerar a los servicios sanitarios como una empresa de provisión de servicios que ha de satisfacer la demanda con el menor coste posible, existe el riesgo de creer que los centros sanitarios no tienen nada que ver con la promoción de la salud o que lo comunitario no nos atañe. Hay que dar herramientas, apoyo, y reconocer que el marco de la promoción de la salud y la intervención comunitaria es esencialmente participativo y colaborativo, y no se puede entender de otra forma. Los sistemas sanitarios trabajan con personas, los centros sanitarios se insertan en una comunidad. ¡No deben desconectarse de ella! La participación comunitaria es necesaria para desarrollar una ciudadanía activa, y se inscribe en un contexto de cambio paradigmático de las políticas sanitarias, que concibe el sistema sanitario como un factor necesario para promover la cohesión y la integración social, y la mejora de la salud individual y colectiva, y que responde a las necesidades de la gente. Estamos hablando de un tema de voluntad política, de hacer política para mejorar la salud de la población. ¿Está claro, pues, lo que hay que hacer? Cierto que introducir y desarrollar nuevas actuaciones puede suponer dejar de hacer otras, ya que los recursos son finitos, pero es deber de las Administraciones conocer, evaluar y priorizar las intervenciones que puedan ser más pertinentes y apropiadas, más eficientes y equitativas para la salud de la población. Evitemos la improvisación, la yatrogenia, las acciones inadecuadas; *primum non nocere* también en lo comunitario. Busquemos alianzas entre salud pública, atención primaria y ciudadanía, y tengamos humildad: el sistema sanitario tiene que asumir que su influencia sobre la dimensión colectiva de la salud es parcial y menor que la de otros sectores.

**Isabel:** Se debería dar importancia y visibilidad a la salud comunitaria, y esto incluye dotarla de mayor presupuesto, reservar tiempos de los profesionales, etc. Trabajar por comunidades sanas debería tener tanto valor como las intervenciones individuales para curar o rehabilitar. En salud mental deberíamos escuchar lo que los movimientos como *Supervivientes de la psiquiatría, Personas con sufrimiento psíquico* o *Escuchadores de voces* dicen sobre lo que funciona y lo que no para promocionar y atender la salud mental, y sobre la importancia de construir, pensar y reivindicar en colectivo. Se debería atender a los procesos personales de recuperación y adaptar la red de salud mental a ellos, y no intentar que sean las personas las que encajen en la red. Para esto considero importante aprovechar los recursos comunitarios y mezclarse con la ciudadanía (p. ej., no hacer una liga de fútbol para personas con discapacidad, sino integrarse en una «normal»).

**Belén:** Que lo social no esté en la periferia… otra cuestión.

**Belén: ¿Qué barreras y fortalezas hay para el desarrollo de la salud comunitaria?**

**Rosa:** Entiendo la pregunta de barreras y fortalezas al desarrollo de la salud comunitaria.

- Barreras:
- La fascinación tecnológica de la sociedad ya comentada: habitualmente, las intervenciones comunitarias no tienen la complejidad tecnológica de otras intervenciones encaminadas a un diagnóstico de una enfermedad que quizá no hubiera aparecido con una intervención comunitaria previa. Y aun siendo necesaria la tecnología, sin duda, las intervenciones comunitarias no tienen valor ante la sociedad. Léase el ejemplo reciente de las donaciones en alta tecnología de un famoso empresario español.
- La falta de evaluación de muchas intervenciones comunitarias, algunas de las cuales se hacen con indudable voluntarismo, pero sin contrastar sus resultados.
- La falta de interés de los gestores, más interesados en una medicina curativa y en apagar fuegos, sin hacer una planificación a largo plazo de lo que deberían ser unos servicios sanitarios orientados a la comunidad.
- La falta de coordinación con otras Administraciones implicadas.
- El individualismo de la sociedad, que limita la planificación y el éxito de intervenciones comunitarias grupales.
- Los medios de comunicación, los intereses partidistas que están más interesados en una medicina curativa con fármacos.
- La falta de formación de los políticos que toman las decisiones, incluyendo en este apartado a los gestores sanitarios.
- La debilidad de los consejos de salud y de los órganos de representación de los ciudadanos en las decisiones de salud.
- La desmotivación y la falta de interés de los profesionales sobre un tema que consideran secundario y para el que no se sienten respaldados.
- Fortalezas:
- El creciente interés de algunos grupos de profesionales y gestores, líderes de opinión, etc., por la importancia de la salud comunitaria.
- Diríase que, a pesar de todo, la salud comunitaria sigue viva.
- La entrada, lenta, pero imparable, de la medicina de familia en la universidad.
- La creación de la especialidad de enfermería comunitaria.
- Las unidades docentes de medicina de familia y comunitaria, con su labor formativa y sensibilizadora.
- La concienciación creciente de los foros de pacientes, asociaciones ciudadanas, etc., sobre la importancia de trabajar en salud comunitaria

**Teresa:** Pero, desde su implantación en España, la atención primaria se ha centrado en la atención individual y no se han desarrollado las acciones comunitarias por los profesionales, y tampoco se han incentivado desde la Administración.

**Rafael:**

- Barreras:
- La escasa o nula formación de los profesionales en la gestión de iniciativas de participación comunitaria, cuando no en el propio constructo de intervención en salud comunitaria.
- La medicalización y «asistencialización» de los centros de salud, orientados hacia la enfermedad y la curación. La forma en que se han utilizado algunos instrumentos de gestión en atención primaria, como la cartera de servicios preestablecida desde arriba o la gestión por procesos asistenciales aplicada como si el hospital fuese una fábrica y los centros de salud sus empresas auxiliares, han favorecido la mencionada orientación hacia la enfermedad y la curación. En relación con lo anterior, hay un aspecto que se ha normalizado por parte de atención primaria y que es tremendamente peligroso para el futuro de la intervención comunitaria: se «deslocalizan» actividades desde el hospital al centro de salud, pero no se trasladan de sitio los recursos necesarios. Estas actividades provenientes del hospital pasan a ocupar espacios destinados inicialmente a promoción y prevención de la salud.
- Los profesionales carecen de incentivos para la promoción de la salud (no se exige, no se reconoce).
- ¿Tienen miedo nuestros políticos del empoderamiento de la sociedad? En el mejor de los casos, parece que no les interesa.
- La no muy abundante evidencia científica sobre este tipo de intervenciones. Es un hecho, pues aunque cada vez hay más evidencias, no están al nivel de otras intervenciones. Pero cuidado, no hay que confundir la ausencia de evidencia con la «evidencia de la ausencia» (es decir, evidencia de que una intervención no sirve, cosa que en este caso no ocurre).
- Fortalezas:
- Las nuevas tecnologías. Las redes sociales son un excepcional medio de comunicación, coordinación y articulación de experiencias comunitarias.
- La integración de las funciones de atención primaria y salud pública en nuestros centros de salud. En algunas comunidades, como es el caso de Andalucía, esa integración se produce incluso en los órganos de gestión del nivel meso.
- Cada vez hay más experiencias positivas con evaluaciones rigurosas.
- La investigación en acción participativa puede ser una buena herramienta para conseguir tres fines en uno: implantar, evaluar y mejorar.

**Belén:** Hay una variabilidad importante en el desarrollo de la parte comunitaria del sistema sanitario, y muchas veces son las periferias de este las que lo ponen en la mesa (atención primaria, salud pública, ciudadanía…). Periferias que deberían estar en el centro del sistema si este de verdad quiere responder a las necesidades de la gente que atiende. Hay fortalezas dentro del sistema muy poco cuidadas por él y absolutamente necesarias, como todo el trabajo social para la orientación comunitaria, lo social, las compañeras incansables trabajadoras sociales, o la perspectiva del trabajo social comunitario que nos aportan. Otras fortalezas son las alianzas en espacios sociales, sociedades científicas o profesionales, las reivindicaciones ciudadanas, los foros… ¡La fortaleza de mirar a la ciudadanía! Las acciones de atención comunitaria o salud comunitaria han sufrido un proceso de invisibilización y desvalorización consciente del sistema. El desarrollo de las actividades comunitarias y de promoción de salud en atención primaria ha presentado dificultades de tipo conceptual y metodológico, con alto grado de voluntarismo. La incorporación de la dimensión comunitaria en la práctica del profesional sanitario supone un cambio de paradigma centrado en la salud y no en la enfermedad, que amplía su perspectiva más allá del sistema sanitario hacia una necesaria participación comunitaria en salud. La atención comunitaria no es tan minoritaria como el sistema cree (o nos hace creer). Para el cambio de paradigma es preciso facilitar el intercambio, la formación, la investigación, la financiación de proyectos o los trabajos de evaluación. Ya existen estudios de investigación en salud comunitaria en los que basarnos para el proceso y que el sistema aborde esta cuestión de la promoción, la participación y lo comunitario, para aumentar la coordinación y la acción y dotar de metodología a los profesionales. Así evitaremos la improvisación, los errores, la yatrogenia y las acciones inadecuadas. En lo comunitario, todo tampoco vale; también podemos dañar, y mucho, lo comunitario desde lo sanitario. ¿Existe una falta de interés en el sistema para que no se desarrolle la cartera de servicios en este sentido o no se dote de mejora de metodología, recursos o evaluación en este aspecto a pesar de la continua demostración de la evidencia en la década de la crisis de la medicina basada en la evidencia? ¿Son unos locos y locas quienes se atreven? ¿Se podrá contagiar cual una gripe? Hay muchos temas, de los que hay evidencia científica en las intervenciones comunitarias, que se centran en problemas de salud prevalentes y que han demostrado efectividad. ¿Habrá quizá que dejar de solicitar que se genere más evidencia para actuar y pasar de una vez a la acción? ¿Por qué el sistema pide más «muestras de realidad a unos que a otros»? ¿Por qué existe desigualdad en la valoración de lo científico cuando hablamos de promoción de salud o de salud comunitaria? Basta ya de ampararnos en la falta de evidencia.

**Isabel:**

- Barreras:
- El poder de la industria farmacéutica y de los enfoques biologicistas, y los que achacan la enfermedad a la responsabilidad individual de quien la padece. Hay una explicación predominante sobre los problemas de salud, en la que no caben las explicaciones que hacen referencia a los determinantes sociales de la salud ni las soluciones colectivas al problema.
- Demasiado «protagonismo» de los profesionales sanitarios en las intervenciones; hay que ir cediendo poder a otros actores.
- Faltan más investigación y evidencia de que las intervenciones realizadas en el marco de la salud comunitaria funcionan.
- Dentro de los sistemas sanitarios no se valoran las intervenciones comunitarias al mismo nivel que otras; hay altas dosis de voluntarismo para poner en marcha proyectos e intervenciones.
- En el caso de la salud mental, la explicación que se da a los problemas de salud mental desde el enfoque biomédico predominante hace que la solución esté fuera de lo que las personas pueden decidir; la única alternativa propuesta en la mayoría de los casos es ponerse en manos de profesionales sanitarios y tomar medicación de por vida, y con este modelo tampoco hay mucho que se pueda hacer desde lo comunitario para promocionar la salud mental.
- La salud mental comunitaria es la gran olvidada dentro de la ya de por sí olvidada salud mental, en muchas comunidades autónomas concertada (menos presupuesto, menos valoración por parte de la administración).

- Fortalezas:
- El trabajo en equipo y la disponibilidad y capacidad para incorporar visiones interdisciplinarias e intersectoriales; la posibilidad de análisis complejo, holístico y sobre el terreno para realidades complejas, lo que permite valorar distintas dimensiones de las necesidades y oportunidades en salud.
- El constante desarrollo y la innovación que se van dando en este ámbito.
- La motivación de las personas que trabajamos y «nos creemos» este enfoque, que se contrapone a la falta de liderazgo y de voluntad política.

**Belén: ¿Hasta dónde llegan las responsabilidades en salud comunitaria?**

**Rosa:** En este momento, creo que son las direcciones de salud pública, al menos en algunas comunidades, las que están manteniendo la llama viva de la salud comunitaria, al margen del voluntarismo ya comentado de grupos de profesionales. Realmente creo que no están definidas las competencias de cada actor en la parte que le toca en el desarrollo de salud comunitaria. Quizá es una tarea de planificación estratégica política, e incluso uno de los objetivos que podrían plantearse en el Consejo Interterritorial de Salud. Porque efectivamente falta una definición de salud comunitaria, engarzada en el objetivo estratégico de «Salud para todos», y en este contexto hay que definir quién hace qué. En mi opinión:

- Hay responsabilidad en los gestores que destinan fondos públicos a la investigación, que deben destinar partidas específicas para evaluación e implementación de intervenciones comunitarias.
- Hay responsabilidad en la Administración local, que debe tomar conciencia de su papel activo en la promoción de estilos de vida saludables.
- Hay responsabilidad en la gestión de los servicios sanitarios, que debe incorporar y normalizar en la cartera de servicios las intervenciones comunitarias.
- Y por último, hay responsabilidad en los profesionales, que tienen que asumir dentro de sus competencias la salud comunitaria.

Globalmente, las responsabilidades llegan hasta donde se pueda conseguir el objetivo de mejorar la salud comunitaria.

**Teresa:** Trabajar con la comunidad no puede entenderse desde un planteamiento jerárquico y de autoridad, sino desde la cooperación y el asesoramiento. Empoderar a las personas, tanto de manera individual como colectivamente, obliga a comprender que son, cada una de ellas y su propia comunidad, los dueños de su salud. Pero, hasta hace poco más de un década, la némesis médica ha predominado sobre la participación comunitaria y ha relegado a la población al papel de sujeto pasivo de su salud.

**Rafael:** A las políticas estatales y autonómicas, los ayuntamientos, los servicios de salud y las universidades.

**Belén:** A todos y todas, aquí nadie se escapa, y a todos los niveles. Trabajar mirando el terreno, coordinándonos con la gente allí donde vive.

**Isabel:** La responsabilidad de la salud de una comunidad debería ser de la ciudadanía, de las personas que trabajamos en lo sanitario, lo social y lo educativo, y de los responsables políticos y las instituciones. Sin embargo, la responsabilidad de apoyar, valorar, visibilizar y fomentar el desarrollo de la salud comunitaria es de quien tiene el poder para tomar decisiones políticas.

**Belén: ¿Quién hace qué y quién debería hacer qué?**

**Teresa:** Cada vez más se empiezan a vislumbrar cambios en la cultura, tanto profesional como social, que nos van acercando hacia una interacción de cooperadores con un mismo objetivo: la mejora de las condiciones de vida que conducen a más salud. La asimilación del profesional como asesor o acompañante en los problemas de salud de sus pacientes, ofreciendo consejos y alternativas, unida a una «sana» reivindicación de los ciudadanos sobre su autorresponsabilidad, autocuidado y el control de la gestión del sistema, es la vía para reducir esas distancias.

**Rafael:** Las políticas estatales y autonómicas deberían apostar (presupuestariamente) por elementos que favorezcan la intervención comunitaria: políticas que apoyen la salud, peso de la atención primaria en el sistema de atención a la salud, coordinación intersectorial y mecanismos de participación comunitaria. Especial mención merece el hecho de disminuir la asimetría entre obligaciones y presupuesto asignado que padece actualmente la atención primaria respecto al nivel especializado. La atención primaria debería reorientarse para dar cabida a la orientación comunitaria, la promoción de la salud y el carácter proactivo de la atención. Para ello pueden ayudar algunas ideas: negociar las carteras de servicios de abajo arriba, potenciar la posibilidad de participación de la enfermería en promoción de salud mediante mecanismos de gestión y racionalización de la demanda, o ensayar nuevas fórmulas de asignación de población más compatibles con la orientación comunitaria (p. ej., la sectorización), o potenciar la formación en intervenciones en salud comunitaria. Los ayuntamientos deben asumir su papel predominante en el marco en la intervención comunitaria. Tienen una posición privilegiada al estar en contacto continuo con asociaciones y movimientos de participación ciudadana. Es recomendable que las facultades den entidad de materia troncal a la atención familiar y comunitaria. En este aspecto, enfermería está algo mejor que medicina, al ser común la existencia de la materia de enfermería familiar y comunitaria. No obstante, en los planes de grado de enfermería se ha observado en muchas facultades una tendencia a disminuir el número de asignaturas de dicha materia, quedando reducida a una sola en algunos planes de estudios. En estos casos, en dicha asignatura deben introducirse todos los contenidos de la materia, que abarcan el trabajo de la enfermera en atención primaria, epidemiología, orientación comunitaria de los cuidados, intervención comunitaria y con familias… Demasiado. En general, se produce un círculo vicioso (no se enseña porque no se practica, no se practica porque no se enseña) que solo puede romperse con una apuesta decidida por estos contenidos. Mi situación personal (mi asignatura persigue la orientación de los cuidados a la salud de la comunidad) está impregnada de la sensación de hacer «enfermería ficción», pero no hay otra opción. Si no, los nuevos profesionales salen con la misma visión medicalizada y hospitalocentrista con la que suelen entrar a la facultad.

**Belén:** La invisibilización consciente del sistema cuenta como antídoto con un impulso claro de grupos científicos, de profesionales, de algunas instituciones, del tercer sector y de la ciudadanía y la población que vienen trabajando por cambiaresta realidad, y han demostrado que con un concepto amplio y multidisciplinario y de abordaje participado de la salud es posible mejorar la salud a lo largo y ancho del sistema sanitario. Actuaciones, acciones o proyectos en los que se impulsa un modelo alternativo de trabajo con una orientación desmedicalizadora, y a través de la participación de los ciudadanos y la toma de decisiones descentralizada, superando el modelo biomédico predominante. Quizá solo hay que mirarlos. El abordaje comunitario radica en la participación efectiva y concreta de la comunidad en la fijación de prioridades, la toma de decisiones y la elaboración y la puesta en marcha de estrategias de planificación para alcanzar un mejor nivel de salud. La fuerza motriz de este proceso proviene del poder real de las comunidades, de la posesión y del control que tengan sobre sus propios empeños y destinos. El desarrollo de la comunidad se basa en los recursos humanos y materiales con que cuenta ella misma para estimular la independencia y el apoyo social, así como para desarrollar sistemas flexibles que refuercen la participación pública y el control de las cuestiones sanitarias. Esto requiere un total y constante acceso a la información y a la instrucción sanitaria, así como ayuda financiera. ¡La salud comunitaria y la participación en los presupuestos del sistema! El sistema sanitario quizá tendrá que esforzarse en mirar, visibilizar, conocer y reconocer las experiencias que están en marcha, y buscar apoyos para su impulso. O quizá potenciar la investigación en la efectividad de muchas de las acciones desarrolladas en atención primaria, ya que las intervenciones comunitarias son coste-eficaces y demuestran mejoras en el autocuidado y los conocimientos sobre la enfermedad.

**Isabel:** Las instituciones públicas deben valorar, incluir en sus planes y dotar de presupuesto a la salud comunitaria, incluyendo la formación de profesionales en este ámbito. Las personas profesionales de la salud tienen que coordinarse con movimientos y agentes de la comunidad y profesionales de otros sectores. Acompañar y facilitar a las comunidades para tomar conciencia de la corresponsabilidad para mejorar la salud. Reivindicar. Investigar. Es importante que estemos dispuestos a ceder poder para que otras personas puedan tomarlo. Y las personas de la comunidad deben organizarse colectivamente, tomar conciencia de las necesidades y de los activos para la salud de su comunidad, participar y reivindicar.

**Belén: ¿Cómo nos coordinamos? ¿Cómo deberíamos hacerlo?**

**Teresa:** Para acelerar estos procesos es necesario aplicar políticas globales desde la Administración basadas en el aforismo «Salud en todas las políticas», y desde un punto de vista más específico en sanidad hay que incentivar las experiencias comunitarias en los profesionales, hay que replantear la forma de relacionar a los actores implicados (profesionales, ciudadanos y gestores) mediante órganos de participación capaces de integrar la toma de decisiones compartidas en salud con mecanismos de transparencia que permitan el control de la gestión del sistema, y hay que encontrar mecanismos de dinamización social que aumenten la sensibilidad ciudadana hacia su propia salud y hacia la salud del sistema sanitario del que, al fin y al cabo, somos propietarios.

**Rafael:** No tengo mucho que aportar en este aspecto, pero creo que el centro de salud debe de ser el detonante, y el ayuntamiento el que lidere y coordine el proceso.

**Belén:** El individualismo en la acción de los sistemas sanitarios es el reflejo de un sistema socioeconómico que obvia los principales determinantes de la salud y los pilares básicos del proceso salud-enfermedad: atención primaria, acción intersectorial y participación comunitaria. Pongamos lo social en el centro. Las causas de las causas. El sistema sanitario cuenta con marcos estratégicos de promoción de la salud que implican la coordinación y la participación de instituciones, servicios sanitarios y ciudadanía; si no hay un cambio en el «hacer» del sistema no seremos capaces de afrontar los problemas de salud más importantes y habituales de nuestras consultas en la situación socioeconómica actual. Usemos los marcos: reconozcámoslos, visibilicémoslos, apostemos por ellos. No hay que inventar nada, solo mirarlo y retomarlo.

**Isabel:** Nos coordinamos como podemos. A veces, alargando nuestras jornadas, con altas dosis de voluntarismo. La coordinación con agentes comunitarios debería estar contemplada en los tiempos de trabajo. La coordinación entre lo social, lo sanitario y lo educativo debería ser «obligatoria», tanto para las personas que trabajan en estos recursos en los barrios como para los responsables políticos y quienes trabajan como técnicos de la Administración.

Participantes en el diálogo:

**Carmen Belén Benedé Azagra**

Especialista en Medicina Familiar y Comunitaria, CS Canal Imperial-Venecia, Servicio Aragonés de Salud.

Doctora en Medicina.

Investigadora del Grupo de Investigación en Atención Primaria Grupo Consolidado de Investigación B21_17R del Gobierno de Aragón y del GIIS-011

Instituto Investigación Sanitaria Aragón.

Colaboradora extraordinaria, Departamento de Medicina, Psiquiatría y Dermatología, Universidad de Zaragoza.

Coordinación estatal PACAP (Programa de Actividades Comunitarias en Atención Primaria) de la Sociedad Española de Medicina Familiar y Comunitaria.

**Rosa Magallón Botaya**

Especialista en Medicina Familiar y Comunitaria. CS Arrabal, Servicio Aragonés de Salud.

Investigadora del Grupo de Investigación en Atención Primaria Grupo Consolidado de Investigación B21_17R del Gobierno de Aragón y del GIIS-011 de redIAPP.

Coordinadora del Programa de Investigación en Salud Publica y Atención Primaria, Instituto de Investigación Sanitaria Aragón.

Doctora en Medicina.

Profesora de Medicina de Familia y Comunicación, Departamento de Medicina, Universidad de Zaragoza.

Presidenta de la Red Española de Atención Primaria (REAP).

Miembro del Consejo de Salud de Aragón.

Concejal del Ayuntamiento de Utebo (Zaragoza).

**Rafael del Pino Casado**

Doctor en Enfermería.

Licenciado en Antropología Social y Cultural.

Experto en Gestión Sanitaria.

Profesor de Enfermería Comunitaria, Universidad de Jaén.

**Teresa Martín Melgarejo**

Licenciada en Derecho, Periodismo y Educación Social.

Presidenta de la Asociación de Usuarios de Sanidad de la Región de Murcia.

Miembro del Observatorio de Exclusión Social de la Universidad de Murcia.

Gestión de Proyectos de Cooperación Internacional y de la Unión Europea en el Ayuntamiento de Murcia.

**María Isabel Vidal Sánchez**

Terapeuta ocupacional.

Socia trabajadora de la Cooperativa de Iniciativa Social 2.ª vía. Acompañamiento Terapéutico. Salud Mental Comunitaria.

Responsable del Área de sensibilización y promoción de la salud.

Profesora asociada, Universidad de Zaragoza.
